# Supplementary material for: Reduced diversity and altered composition of the gut microbiome in individuals with myalgic encephalomyelitis/chronic fatigue syndrome
Source: PubMed Central journal article supplement (PMC4918027; doi:10.1186/s40168-016-0171-4), 2016-06-23
Supplement: 40168_2016_171_MOESM1_ESM.pdf [file 40168_2016_171_MOESM1_ESM.pdf]

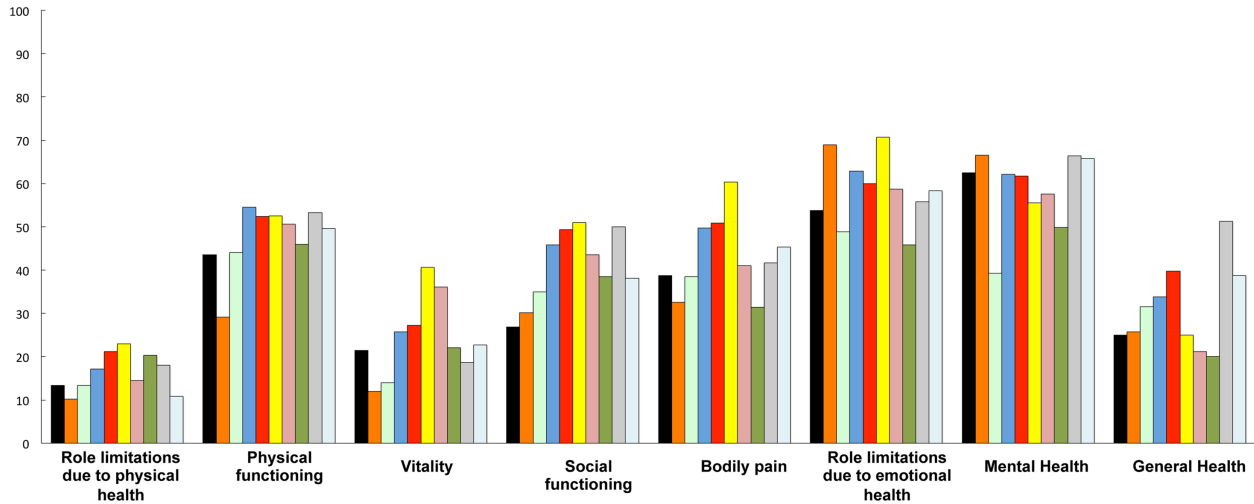

This study, n = 49    
  Hassan *et al.* 1998, n = 44    
  King & Jason 2005, n = 15    
  Komaroff *et al.* 1996, n = 223

Myers & Wilks 1999, n = 85    
  Nijs *et al.* 2008, n = 24    
  Nijs & Thielemans 2008, n = 100

Nijs & Thielemans 2008, n = 48    
  Reeves *et al.* 2005, n = 43    
  Taillefer *et al.* 2002, n = 45
