# Supplementary material for: Reduced diversity and altered composition of the gut microbiome in individuals with myalgic encephalomyelitis/chronic fatigue syndrome
Source: Springer Nature journal article supplement (doi:10.1186/s40168-016-0171-4), 2016-06-23
Supplement: 40168_2016_171_MOESM2_ESM.pdf [file 40168_2016_171_MOESM2_ESM.pdf]

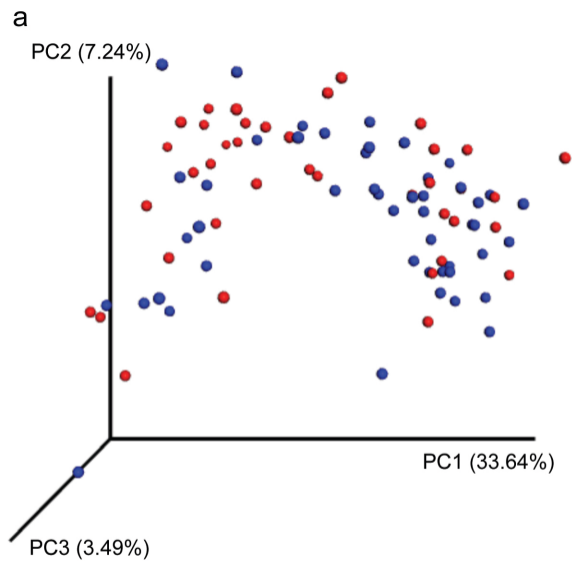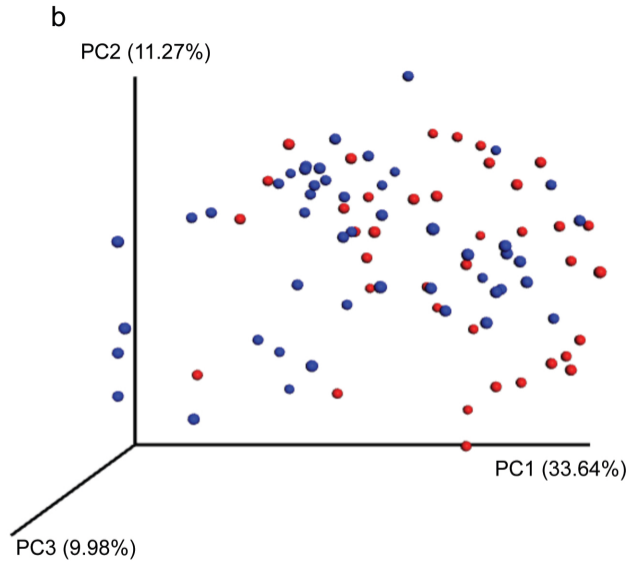

● ME/CFS ● CONTROLS
