# Supplementary material for: Reduced diversity and altered composition of the gut microbiome in individuals with myalgic encephalomyelitis/chronic fatigue syndrome
Source: PubMed Central journal article supplement (PMC4918027; doi:10.1186/s40168-016-0171-4), 2016-06-23
Supplement: 40168_2016_171_MOESM4_ESM.pdf [file 40168_2016_171_MOESM4_ESM.pdf]

|                   |          | Predicted categories |        |
|-------------------|----------|----------------------|--------|
|                   |          | CONTROLS             | ME/CFS |
| Source categories | CONTROLS | 24.86                | 11.63  |
|                   | ME/CFS   | 18.60                | 44.90  |
| ROC AUC value     |          | 0.7545               |        |

|                   |          | Predicted categories |        |
|-------------------|----------|----------------------|--------|
|                   |          | CONTROLS             | ME/CFS |
| Source categories | CONTROLS | 29.06                | 10.67  |
|                   | ME/CFS   | 14.40                | 45.87  |
| ROC AUC value     |          | 0.7612               |        |

|                   |          | Predicted categories |        |
|-------------------|----------|----------------------|--------|
|                   |          | CONTROLS             | ME/CFS |
| Source categories | CONTROLS | 24.36                | 8.84   |
|                   | ME/CFS   | 19.10                | 47.70  |
| ROC AUC value     |          | 0.7402               |        |
